# Supplementary material
Source: PubMed Central journal article supplement (PMC1895858)

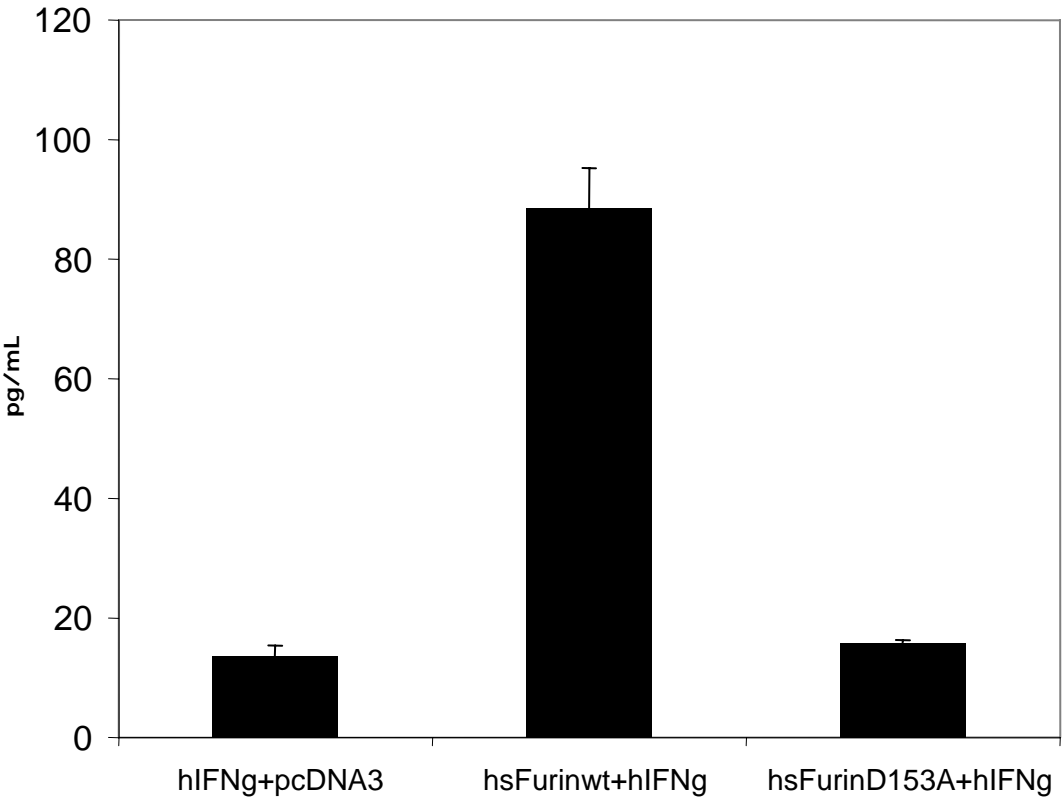

Supplement: blood_2005-09-3824_1.pdf [file blood_2005-09-3824_1.pdf]

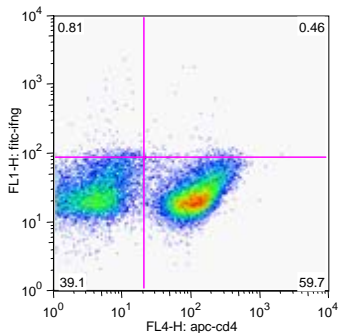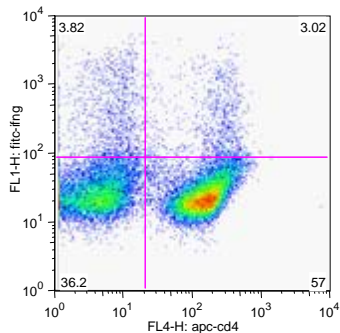

$\alpha_1$ -AT

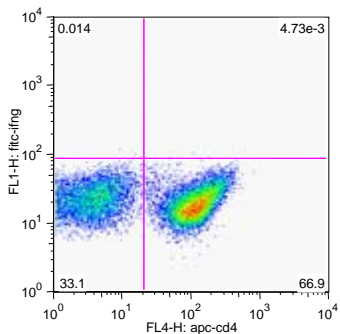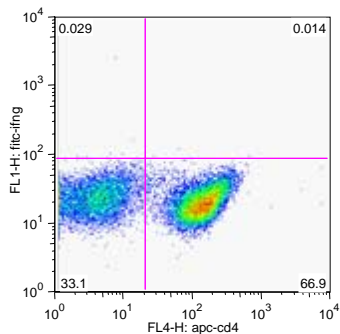

$\alpha_1$ -PDX

Unstimulated

IL-12

Supplement: blood_2005-09-3824_2.pdf [file blood_2005-09-3824_2.pdf]

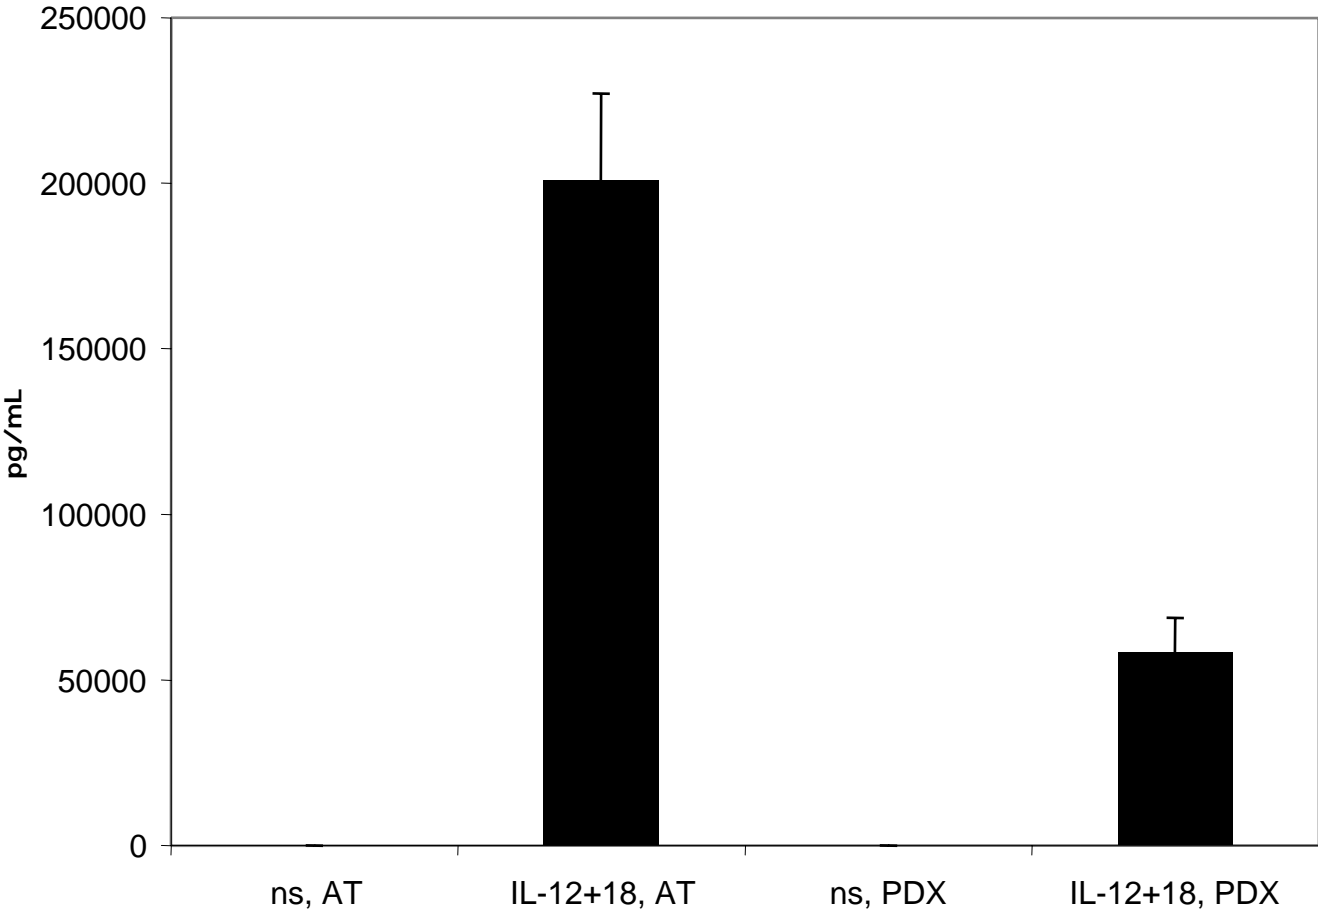

Supplement: blood_2005-09-3824_3.pdf [file blood_2005-09-3824_3.pdf]
